# Supplementary material for: Triple hierarchy and double synergies of NiFe/Co9S8/carbon cloth: a new and efficient electrocatalyst for the oxygen evolution reaction
Source: Royal Society of Chemistry journal article supplement (doi:10.1039/c8nr09740b), 2019-01-01
Supplement: c8nr09740b1.pdf [file c8nr09740b1.pdf]

## Triple Hierarchy and Double Synergies of NiFe/Co<sub>9</sub>S<sub>8</sub>/Carbon Cloth: A New and Efficient Electrocatalyst for Oxygen Evolution Reaction

Changhong Zhan<sup>a</sup>, Zheng Liu<sup>a</sup>, Yang Zhou<sup>a</sup>, Mingliang Guo<sup>a</sup>, Jinchun Tu<sup>a</sup>, Lei Ding<sup>a,\*</sup> and Yang Cao<sup>a,b,†</sup>

<sup>a</sup> College of Materials and Chemical Engineering, State Key Laboratory of Marine

Resource Utilization in South China Sea, Hainan University, Haikou 570228, China.

<sup>b</sup> Qiongtai Normal University, Haikou 571127, Hainan, China

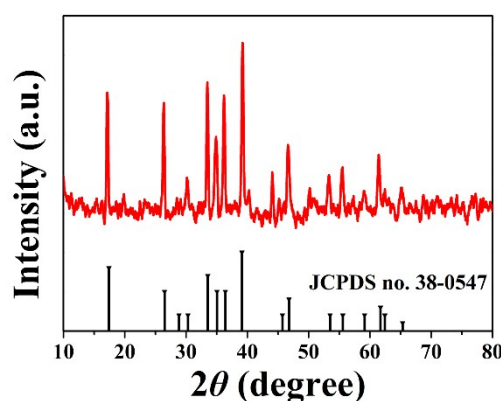

Fig. S1 XRD pattern of Co(CO)<sub>0.35</sub>·Cl<sub>0.20</sub>(OH)<sub>1.10</sub>·1.74H<sub>2</sub>O precursor.

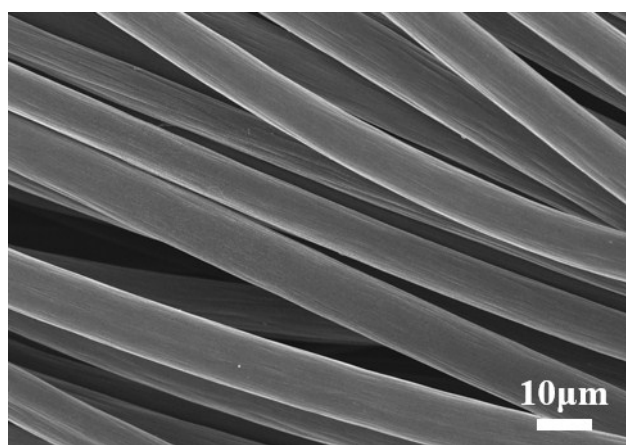

Fig. S2 SEM images of bare CC.

\* E-mail address: [Lding@hainu.edu.cn](mailto:Lding@hainu.edu.cn) (L. Ding).

† E-mail address: [cy507@hainu.edu.cn](mailto:cy507@hainu.edu.cn) (Y. Cao)

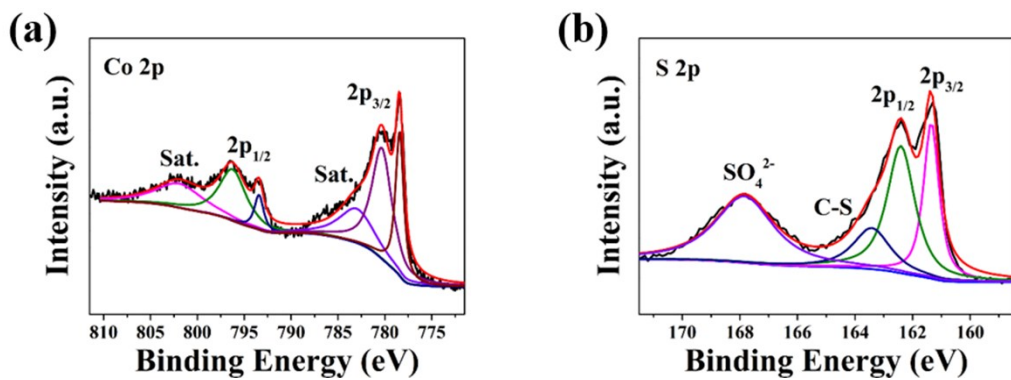

Fig. S3 XPS spectra of (a) Co 2p; (b) S 2p of  $Co_9S_8/CC$ .

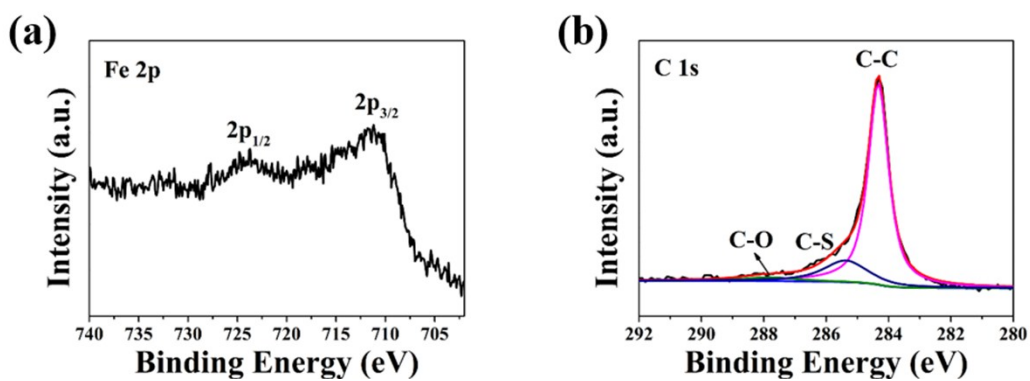

Fig. S4 XPS spectra of (a) Fe 2p; (b) C 1s of  $NiFe/Co_9S_8/CC$ .

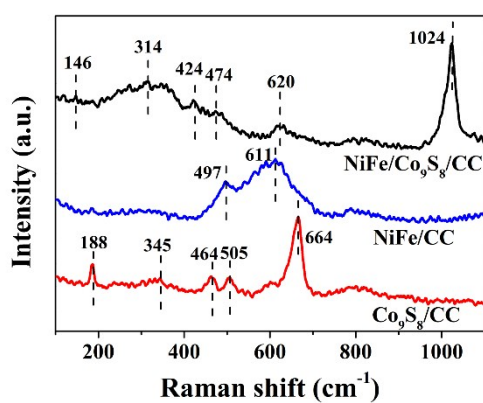

Fig. S5 Raman of  $NiFe/Co_9S_8/CC$ ,  $NiFe/CC$ , and  $Co_9S_8/CC$ .

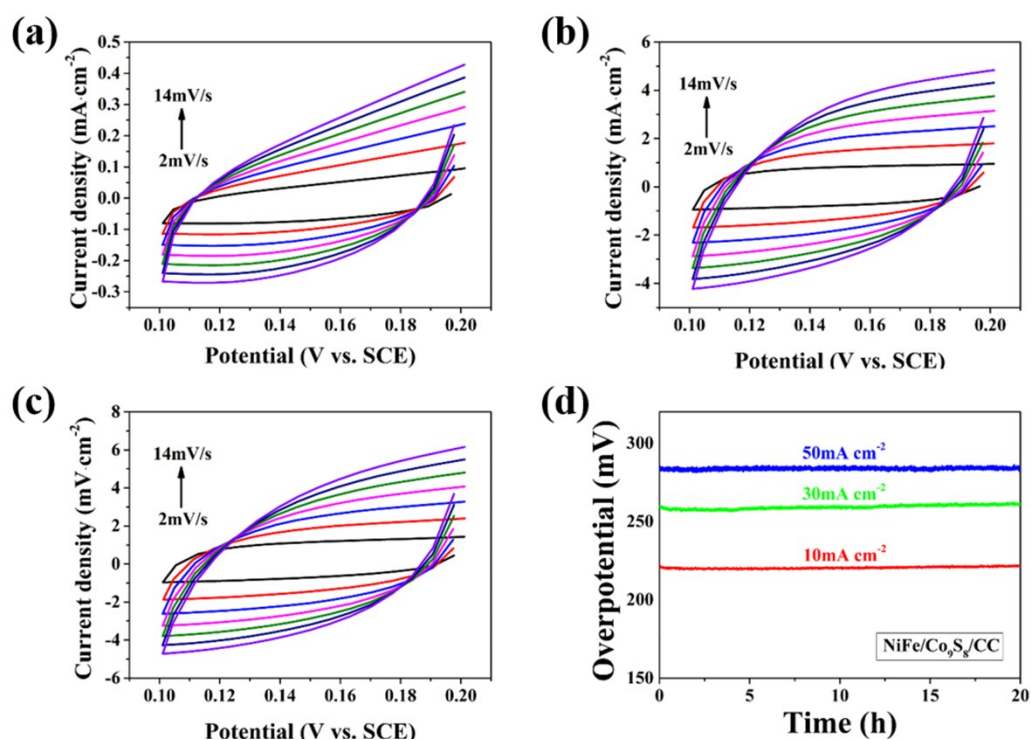

Fig. S6 CV curves of different electrodes in double layer region at various scan rates ranging from 2 to 14 mV s<sup>-1</sup>: (a) NiFe/CC; (b) Co<sub>9</sub>S<sub>8</sub>/CC; (c) NiFe/Co<sub>9</sub>S<sub>8</sub>/CC. (d) Stability of NiFe/Co<sub>9</sub>S<sub>8</sub>/CC at 10, 30, and 50 mA cm<sup>-2</sup>.

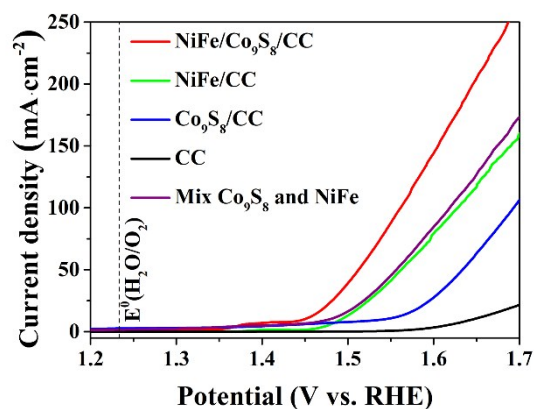

Fig. S7 The polarization curve of NiFe/Co<sub>9</sub>S<sub>8</sub>/CC and Mixing Co<sub>9</sub>S<sub>8</sub> and NiFe.

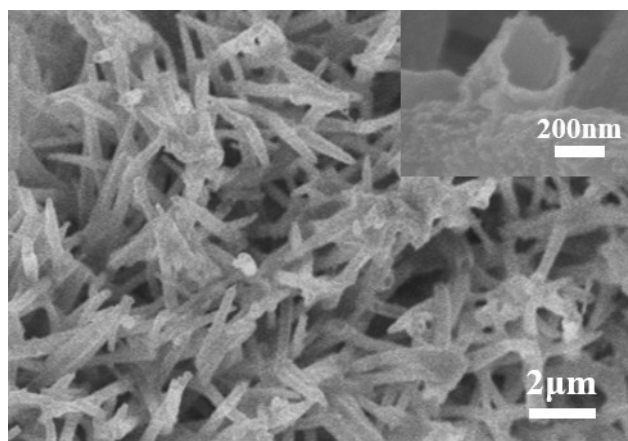

Fig. S8 SEM image of NiFe/Co<sub>9</sub>S<sub>8</sub>/CC after long-term stability test.

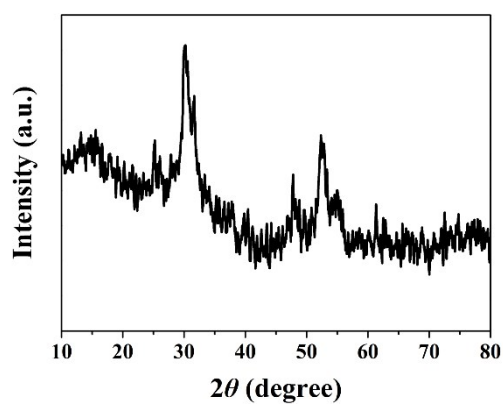

Fig. S9 XRD pattern of NiFe/Co<sub>9</sub>S<sub>8</sub>/CC after long-term stability test.

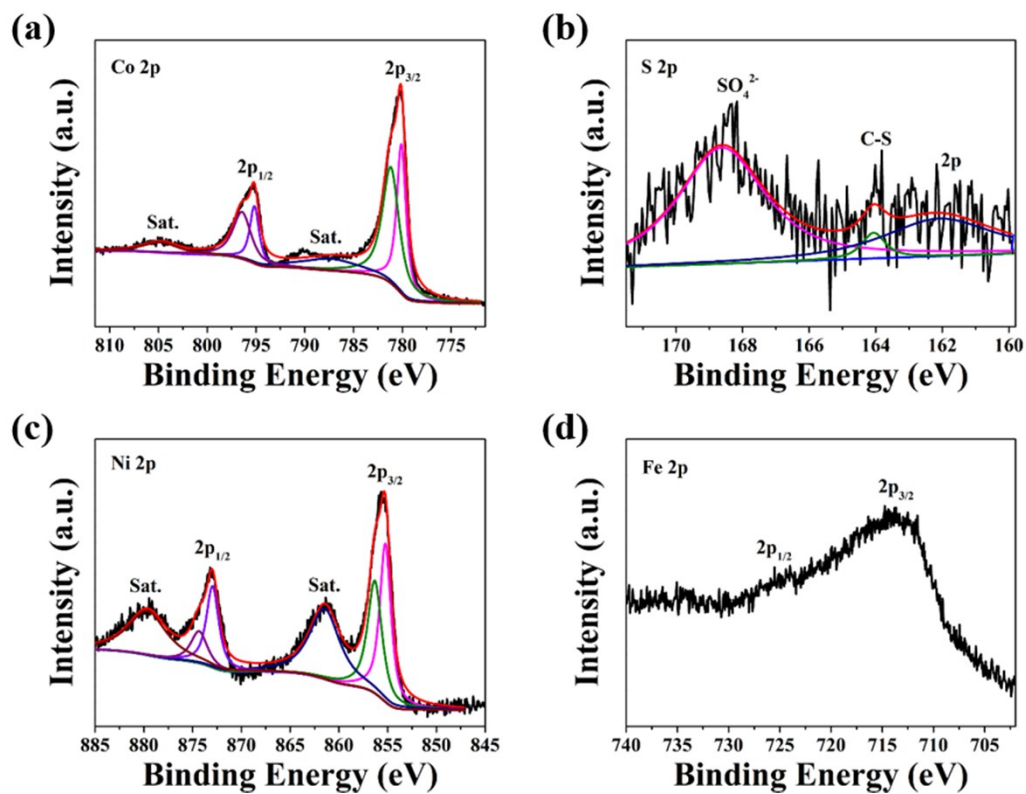

Fig. S10 XPS spectra of (a) Co 2p; (b) S 2p; (c) Ni 2p; (d) Fe 2p of NiFe/Co<sub>9</sub>S<sub>8</sub>/CC after long-term stability test.
